# Supplementary material
Source: PubMed Central journal article supplement (PMC3204827)

## Supplemental Table 1

Supplemental Table 1. List of the genes with upregulated expression comparing liver metastatic colon cancer L-1 and L-2 cells with non-metastatic SW480 and SW620 cells.

| UniGene   | Gene Symbol | Descriptions                                             | Fold Change | P Value  |
|-----------|-------------|----------------------------------------------------------|-------------|----------|
| Hs.654472 | LIPC        | Hepatic lipase                                           | 8.3         | 0.000225 |
| Hs.614734 | CD133       | prominin-like 1 (PROML1)                                 | 7.6         | 0.000044 |
| Hs.660143 | APOBEC3G    | phorbol-in-like protein (MDS019)                         | 7.4         | 0.00007  |
| Hs.65425  | CALB1       | calbindin 1                                              | 6.8         | 0.000052 |
| Hs.374650 | IFITM3      | interferon induced transmembrane protein 3               | 5.5         | 0.000581 |
| Hs.149239 | EFNB2       | Human LERK-5 (EPLG5)                                     | 5.1         | 0.001796 |
| Hs.438102 | IGFBP2      | insulin-like growth factor binding protein 2             | 4.3         | 0.018281 |
| Hs.2962   | S100P       | S100 calcium-binding protein P                           | 4.2         | 0.000109 |
| Hs.524910 | FTH1        | ferritin, heavy polypeptide 1                            | 4.1         | 0.000169 |
| Hs.291196 | ATP1B1      | ATPase, Na+K+ transporting, beta 1 polypeptide           | 4.1         | 0.000081 |
| Hs.3416   | ADFP        | adipose differentiation-related protein                  | 3.8         | 0.000132 |
| Hs.458414 | IFITM1      | interferon induced transmembrane protein 1               | 3.8         | 0.000258 |
| Hs.720143 | FAAH        | fatty acid hydroxylase                                   | 3.7         | 0.00006  |
| Hs.461086 | CDH1        | cadherin 1, type 1, E-cadherin (epithelial)              | 3.7         | 0.000244 |
| Hs.474783 | TST         | Thiosulfate sulfurtransferase (rhodanese)                | 3.7         | 0.00293  |
| Hs.647116 | HCA112      | hepatocellular carcinoma-associated antigen 112          | 3.6         | 0.000732 |
| Hs.507798 | LHFP        | lipoma HMGIC fusion partner                              | 3.6         | 0.005565 |
| Hs.508480 | RAP2A       | RAP2A, member of RAS oncogene family                     | 3.6         | 0.000081 |
| Hs.647090 | LRS         | Transmembrane protein 176B                               | 3.5         | 0.023929 |
| Hs.461086 | Uvo         | Human uvomorulin (E-cadherin)                            | 3.5         | 0.003212 |
| Hs.278658 | KRT86       | type II intermediate filament of hair keratin            | 3.5         | 0.000468 |
| Hs.486470 | EPB41L2     | erythrocyte membrane protein band 4.1-like 2             | 3.5         | 0.001892 |
| Hs.523847 | G1P3        | interferon induced 6-16 protein, isoform c               | 3.5         | 0.007543 |
| Hs.90232  | ProSAP1     | proSAP-interacting protein 1                             | 3.4         | 0.006532 |
| Hs.486548 | MAP7        | microtubule-associated protein 7                         | 3.3         | 0.011447 |
| Hs.592095 | SLC16A5     | solute carrier family 16, member 5                       | 3.3         | 0.000266 |
| Hs.67397  | HOXA1       | Homeobox A1 {alternatively spliced}                      | 3.3         | 0.021866 |
| Hs.729392 | RAB20       | member RAS oncogene family                               | 3.2         | 0.000468 |
| Hs.525529 | KCNMB4      | potassium large conductance calcium-activated channel    | 3.2         | 0.031336 |
| Hs.280932 | PEX7        | peroxisomal biogenesis factor 7                          | 3.1         | 0.002617 |
| Hs.148641 | CTSH        | Homo sapiens cathepsin H                                 | 3.1         | 0.000232 |
| Hs.284141 | TSPYL4      | TSPYL-like 4                                             | 3.1         | 0.023926 |
| Hs.258429 | ERCC5       | excision repair cross-complementing repair deficiency    | 3.1         | 0.001953 |
| Hs.7277   | PEX3        | peroxisomal biogenesis factor 3                          | 2.9         | 0.00415  |
| Hs.439440 | INTS6       | integrator complex subunit 6                             | 2.9         | 0.018555 |
| Hs.562227 | HSPG2       | Human heparan sulfate proteoglycan                       | 2.9         | 0.001221 |
| Hs.153563 | LY75        | lymphocyte antigen 75                                    | 2.9         | 0.01416  |
| Hs.47099  | GaNAc-T12   | polypeptide N-acetylgalactosaminyltransferase 12         | 2.9         | 0.008057 |
| Hs.445981 | CTNNA1      | cadherin-associated protein                              | 2.7         | 0.015525 |
| Hs.279908 | TFB1M       | transcription factor B1, mitochondrial isoform           | 2.7         | 0.046143 |
| Hs.166091 | LIG4        | DNA ligase IV                                            | 2.7         | 0.033505 |
| Hs.709952 | TOB1        | transducer of ERBB2                                      | 2.7         | 0.001953 |
| Hs.279257 | PCMT1       | protein-L-isoaspartate (D-aspartate) O-methyltransferase | 2.7         | 0.001267 |
| Hs.418367 | NMU         | neuromedin U                                             | 2.7         | 0.008057 |
| Hs.659681 | BCOR        | BCL6 corepressor                                         | 2.6         | 0.005859 |
| Hs.495250 | CCBL1       | cysteine conjugate-beta lyase, cytoplasmic               | 2.6         | 0.000805 |
| Hs.78771  | FGK1        | phosphoglycerate kinase 1                                | 2.6         | 0.011836 |
| Hs.367900 | PDCD2       | programmed cell death 2                                  | 2.6         | 0.000322 |
| Hs.643544 | GW128       | tyrosine 5-monooxygenase activation protein              | 2.5         | 0.00418  |
| Hs.486835 | RMND1       | required for meiotic nuclear division 1 homolog          | 2.5         | 0.004863 |
| Hs.520414 | IFNGR1      | interferon gamma receptor 1                              | 2.5         | 0.014937 |
| Hs.3352   | HDAC2       | histone deacetylase 2                                    | 2.5         | 0.003067 |
| Hs.726226 | SUCLA2      | succinate-CoA ligase, ADP-forming, beta subunit          | 2.5         | 0.048995 |
| Hs.12969  | LOC54103    | Homo sapiens cDNA: FLJ23094 fis, clone LNG07379          | 2.4         | 0.000266 |
| Hs.507498 | MIPEP       | mitochondrial intermediate peptidase                     | 2.4         | 0.013092 |
| Hs.487046 | SOD2        | superoxide dismutase 2                                   | 2.3         | 0.024711 |
| Hs.513617 | MMP2        | metalloproteinase 2                                      | 2.3         | 0.000219 |
| Hs.306123 | MAGEF1      | Melanoma antigen family F, 1                             | 2.3         | 0.003067 |
| Hs.499725 | ANK3        | ankyrin 3, isoform 1                                     | 2.3         | 0.00023  |
| Hs.249441 | WEE1        | wee1+ (S. pombe) homolog                                 | 2.3         | 0.001602 |
| Hs.458358 | TSPYL1      | hypothetical protein                                     | 2.2         | 0.002617 |
| Hs.445999 | TCTEL1      | t-complex-associated-testis-expressed 1-like 1           | 2.1         | 0.013092 |
| Hs.655055 | HSMNP1      | uncharacterized hypothalamus protein                     | 2.1         | 0.008689 |
| Hs.530291 | ANXA11      | annexin XI                                               | 2.1         | 0.000339 |
| Hs.448588 | TNFRSF16    | growth factor receptor associated protein                | 2.1         | 0.000805 |
| Hs.643683 | ITM2B       | integral membrane protein 2B                             | 2.1         | 0.000388 |
| Hs.105940 | JRKL        | jerky (mouse) homolog-like                               | 2           | 0.017001 |
| Hs.654539 | KIAA1253    | Diff33 protein homolog                                   | 2           | 0.000762 |

## Supplemental Table 2

**Supplemental Table 2. List of the genes with downregulated expression comparing liver metastatic colon cancer L-1 and L-2 cells with non-metastatic SW480 and SW620 cells.**

| UniGene   | Gene Symbol | Descriptions                                                | Fold Change | P Value  |
|-----------|-------------|-------------------------------------------------------------|-------------|----------|
| Hs_80296  | PCP4        | Purkinje cell protein 4                                     | -7.8        | 0.00102  |
| Hs_13397  | ITGA6       | integrin, alpha 6                                           | -6.7        | 0.000052 |
| Hs_645227 | TGF-beta    | Human transforming growth factor-beta                       | -6.5        | 0.00007  |
| Hs_193557 | PTPN14      | s protein tyrosine phosphatase, non-receptor type 14        | -5.6        | 0.002559 |
| Hs_326801 | ZNF6        | zinc finger protein 6 (CMPX1)                               | -5.5        | 0.000509 |
| Hs_170355 | MEOX2       | mesenchyme homeo box 2 (growth arrest-specific homeo box)   | -5.2        | 0.000044 |
| Hs_436803 | VBP1        | von Hippel-Lindau binding protein 1                         | -4.9        | 0.00039  |
| Hs129452  | DACH        | dachshund (Drosophila) homolog                              | -4.8        | 0.004017 |
| Hs_727516 | DDAH1       | dimethylarginine dimethylaminohydrolase 1                   | -4.6        | 0.00006  |
| Hs_558396 | SCD         | stearoyl-CoA desaturase (delta-9-desaturase)                | -4.3        | 0.00011  |
| Hs_522819 | IRAK1       | interleukin-1 receptor-associated kinase 1                  | -4.2        | 0.000662 |
| Hs_522826 | SLC10A3     | Solute carrier family 10, member 3                          | -4.1        | 0.00007  |
| Hs_701324 | ARHGAP4     | Rho GTPase activating protein 4                             | -4.1        | 0.000169 |
| Hs_655087 | MCTP1       | multiple C2 domains, transmembrane 1                        | -3.8        | 0.00011  |
| Hs_432822 | MAN2A1      | mannosidase, alpha, class 2A, member 1                      | -3.8        | 0.001953 |
| Hs_380138 | CHN1        | chimerin (chimaerin) 1                                      | -3.7        | 0.00293  |
| Hs_517216 | PEA15       | phosphoprotein enriched in astrocytes 15                    | -3.7        | 0.000244 |
| Hs_4747   | DKC1        | dyskeratosis congenita 1, dyskerin                          | -3.7        | 0.000754 |
| Hs_57698  | H105E3      | NAD(P) dependent steroid dehydrogenase-like                 | -3.6        | 0.001102 |
| Hs_558499 | LOC51293    | Homo sapiens 8D6 antigen                                    | -3.5        | 0.00006  |
| Hs_118400 | SNL         | sea urchin fascin homolog like                              | -3.5        | 0.000095 |
| Hs_534404 | RPL10       | ribosomal protein L10                                       | -3.4        | 0.013811 |
| Hs_401929 | DNASE1L1    | Homo sapiens deoxyribonuclease I-like 1                     | -3.4        | 0.030976 |
| Hs_606320 | MYB         | v-myb avian myeloblastosis viral oncogene homolog           | -3.1        | 0.001796 |
| Hs_6917   | MTCP1       | mature T-cell proliferation 1, clone MGC:2069               | -3.1        | 0.000266 |
| Hs_81874  | MGST2       | microsomal glutathione S-transferase 2                      | -3.1        | 0.000398 |
| Hs_103183 | FMR1        | fragile X mental retardation 1                              | -3          | 0.039365 |
| Hs_291904 | DXS1357E    | accessory proteins BAP31BAP29                               | -2.9        | 0.001892 |
| Hs_58974  | CCNA2       | cyclin A2                                                   | -2.9        | 0.003585 |
| Hs_354056 | POR         | NADPH-cytochrome P450 reductase mRNA                        | -2.8        | 0.000328 |
| Hs_619593 | MGC4175     | Homo sapiens hypothetical protein MGC4175                   | -2.8        | 0.017001 |
| Hs_24167  | SYBL1       | synaptobrevin-like 1                                        | -2.8        | 0.001238 |
| Hs_199695 | MAC30       | hypothetical protein                                        | -2.7        | 0.035163 |
| Hs_433291 | ARD1        | N-acetyltransferase, homolog of S. cerevisiae ARD1          | -2.6        | 0.000562 |
| Hs_303808 | C2ORF3      | Similar to chromosome 2 open reading frame 3                | -2.6        | 0.000244 |
| Hs_435512 | PPP3CA      | protein phosphatase 3, catalytic subunit, alpha isoform     | -2.5        | 0.001221 |
| Hs_472101 | PLCB4       | phospholipase C, beta 4                                     | -2.5        | 0.00293  |
| Hs_6838   | ARHE        | ras homolog gene family, member E                           | -2.5        | 0.010742 |
| Hs_377010 | CAD         | carbamoyl-phosphate synthetase 2                            | -2.4        | 0.00293  |
| Hs_303649 | CCL2        | Chemokine (C-C motif) ligand 2                              | -2.4        | 0.00415  |
| Hs_410197 | IDH3G       | isocitrate dehydrogenase 3 (NAD+) gamma                     | -2.4        | 0.010742 |
| Hs458336  | POP3        | popeye protein 3                                            | -2.3        | 0.00415  |
| Hs_98967  | ATP6N1B     | ATPase, H(+)-transporting noncatalytic accessory protein 1B | -2.3        | 0.001584 |
| Hs_477352 | PDIA5       | protein disulfide isomerase-related protein                 | -2.2        | 0.00392  |
| Hs_288193 | KPNA4       | importin alpha 3                                            | -2.2        | 0.000268 |
| Hs_195464 | FLNA        | filamin A, alpha (actin-binding protein-280)                | -2.2        | 0.01024  |
| Hs_54277  | FAM50A      | XAP-5 protein                                               | -2.2        | 0.03011  |
| Hs_727540 | ADCY3       | type III adenylyl cyclase                                   | -2.2        | 0.000244 |
| Hs_30174  | SNAPC5      | small nuclear RNA activating complex, polypeptide 5         | -2.1        | 0.02032  |
| Hs_278569 | SNX17       | Sorting nexin 17                                            | -2.1        | 0.000419 |
| Hs_15591  | COPS6       | COP9 subunit 6                                              | -2          | 0.005232 |
| Hs_203952 | TRRAP       | transformation/transcription domain-associated protein      | -2          | 0.021984 |

## Supplemental Figure 1

**Supplemental Figure 1. Selection of the genes that may mediate colorectal cancer hepatic metastasis. A,** Functional-clustering analysis of the 68 genes upregulated in L-1 and L-2 cells compared with SW480 and SW620 cells. **B,** 10 genes with at least a 4-fold increase in their expression levels (according to cDNA microarray signals) in L-1 and L-2 cells were selected.

**A**

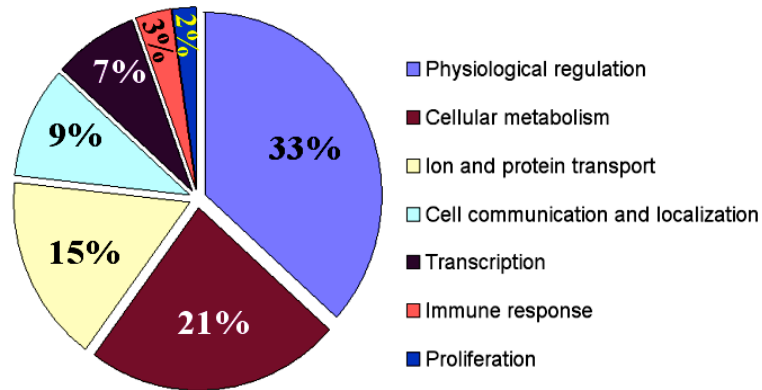

**B**

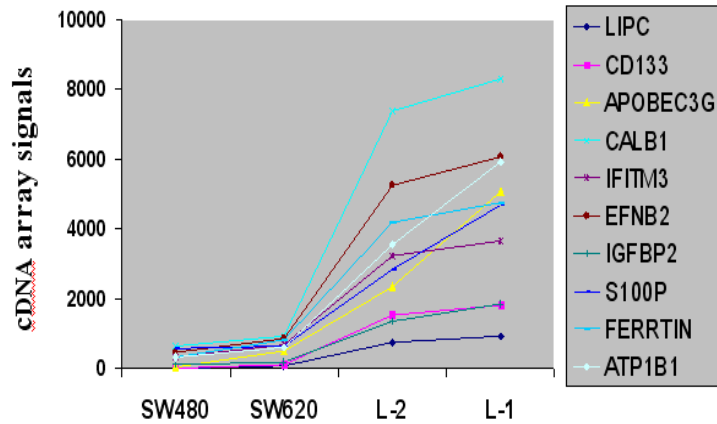

*Supplemental Figure 2*

**Supplemental Figure 2. 10 gene expression levels in the SW480, SW620, L-1 and L-2 cells using RT-PCR analysis.**

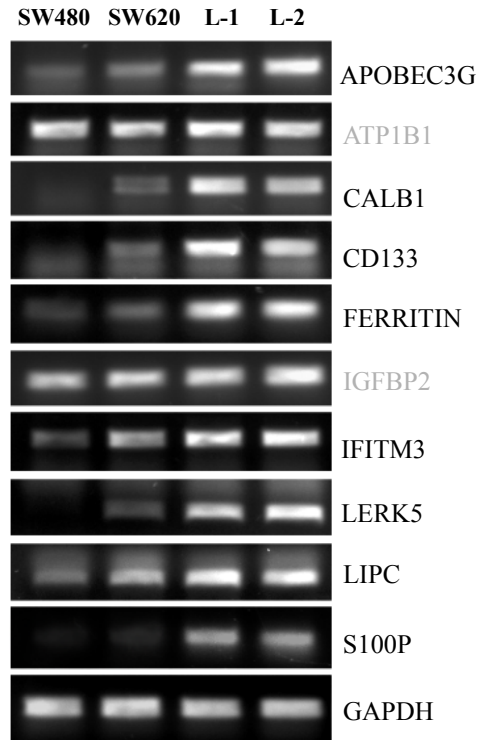

## *Supplemental Figure 3*

### **Supplemental Figure 3. List of siRNA sequences for constructing specific shRNAs.**

#### **APOBEC3G**

5'GATCCCCGTAAGATTGTGCTCAATTCAAGAGATTGAGCACAATCTTAGTACTTTTTA3'  
5'AGCTTAAAAAGTACTAAGATTGTGCTCAATCTCTTGAATTGAGCACAATCTTAGTACGGG3'

#### **CALB1**

5'GATCCCCAGAAGAAAGTCTATGCTTATCAAGAGATAAGCATAGACTTTCTTCTTTTTTA3'  
5'AGCTTAAAAAAGAAGAAAGTCTATGCTTATCTCTTGAATAAGCATAGACTTTCTTCTGGG3'

#### **CD133**

5'GATCCCCCATGAAAGCACAAGGTAATTCAAGAGATTACCTTGTGCTTTCATGTTTTTA3'  
5'AGCTTAAAAACATGAAAGCACAAGGTAATCTCTTGAATTTACCTTGTGCTTTCATGGGG3'

#### **FERRITIN**

5'GATCCCCGGTACAAATCAAAGAACTTTTCAAGAGAAAAGTTCTTTGATTTGTACCTTTTTTA3'  
5'AGCTTAAAAAGGTACAAATCAAAGAACTTTCTCTTGA AAAAGTTCTTTGATTTGTACCGGG3'

#### **IFITM3**

5'GATCCCCCAATAAAGTGCACGTGTTTTTCAAGAGAAAACACGTGCACTTTATTGTTTTTA3'  
5'AGCTTAAAAACAATAAAGTGCACGTGTTTTCTCTTGA AAAACACGTGCACTTTATTGGGG3'

#### **LERK5**

5'GATCCCCGCAAAGATCTCTAGAGTTTTTCAAGAGAAAACCTCTAGAGATCTTTGCTTTTTTA3'  
5'AGCTTAAAAAGCAAAGATCTCTAGAGTTTAGAGAACTTAAACTCTAGAGATCTTTGCGGG3'

#### **LIPC**

5'GATCCCCTAATGAAGACCCAGTGTAATTCAAGAGATTACACTGGGTCTTCATTATTTTTTA3'  
5'AGCTTAAAAATAATGAAGACCCAGTGTAATCTCTTGAATTACACTGGGTCTTCATTAGGG3'

#### **S100P**

5'GATCCCCGCTCATGTACCTCTGATTATTCAAGAGATAATCAGAGGTACATGAGCTTTTTTA3'  
5'AGCTTAAAAAGCTCATGTACCTCTGATTATCTCTTGAATAATCAGAGGTACATGAGCGGG3'

## Supplemental Figure 4

**Supplemental Figure 4. Validation of retroviral shRNAs in L-1 cells.** **A**, shRNAs targeting Group A genes (APOBEC3G, CD133, LIPC, and S100P), and group B genes (CALB1, IFITM3, LERK5, and FERRITIN). The effectiveness of shRNAs (si-4A, si-4B) was validated by immunoblotting. **B**, Because of the unavailability of an antibody for FERRITIN, FERRITIN expression was detected by RT-PCR.

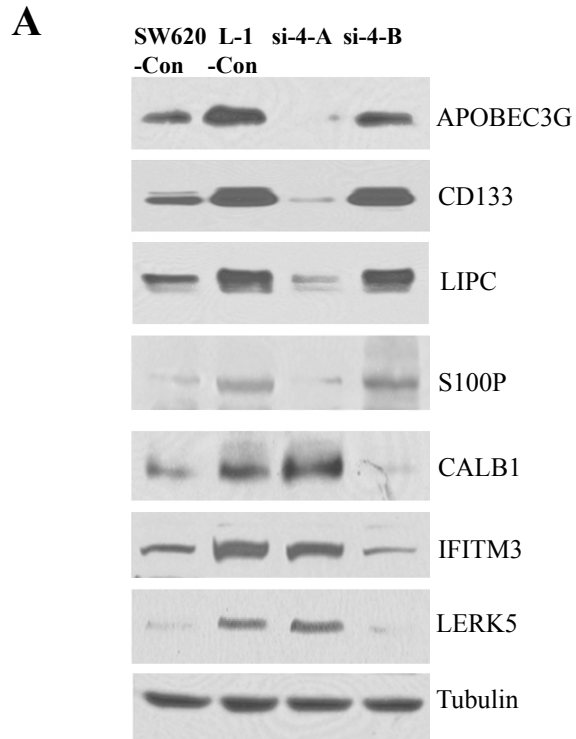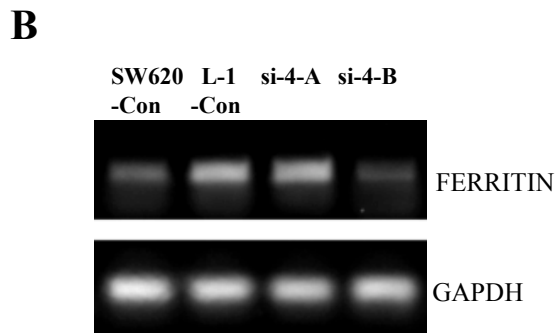

## Supplemental Figure 5

**Supplemental Figure 5.** Knocking-down either one of the four Group A genes was not sufficient to decrease the liver metastasis rate in orthotopic animal model, compared with knocking-down all four genes (\*P<0.05).

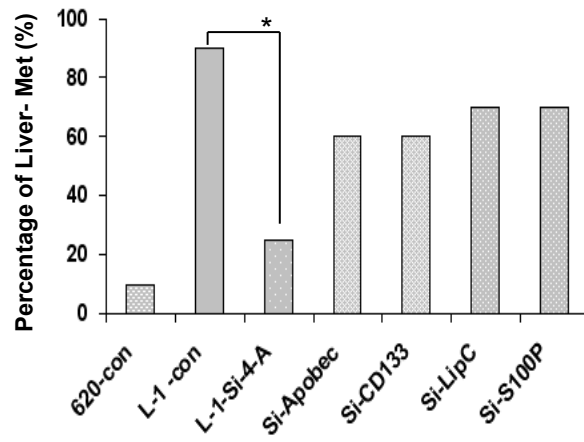

## Supplemental Figure 6

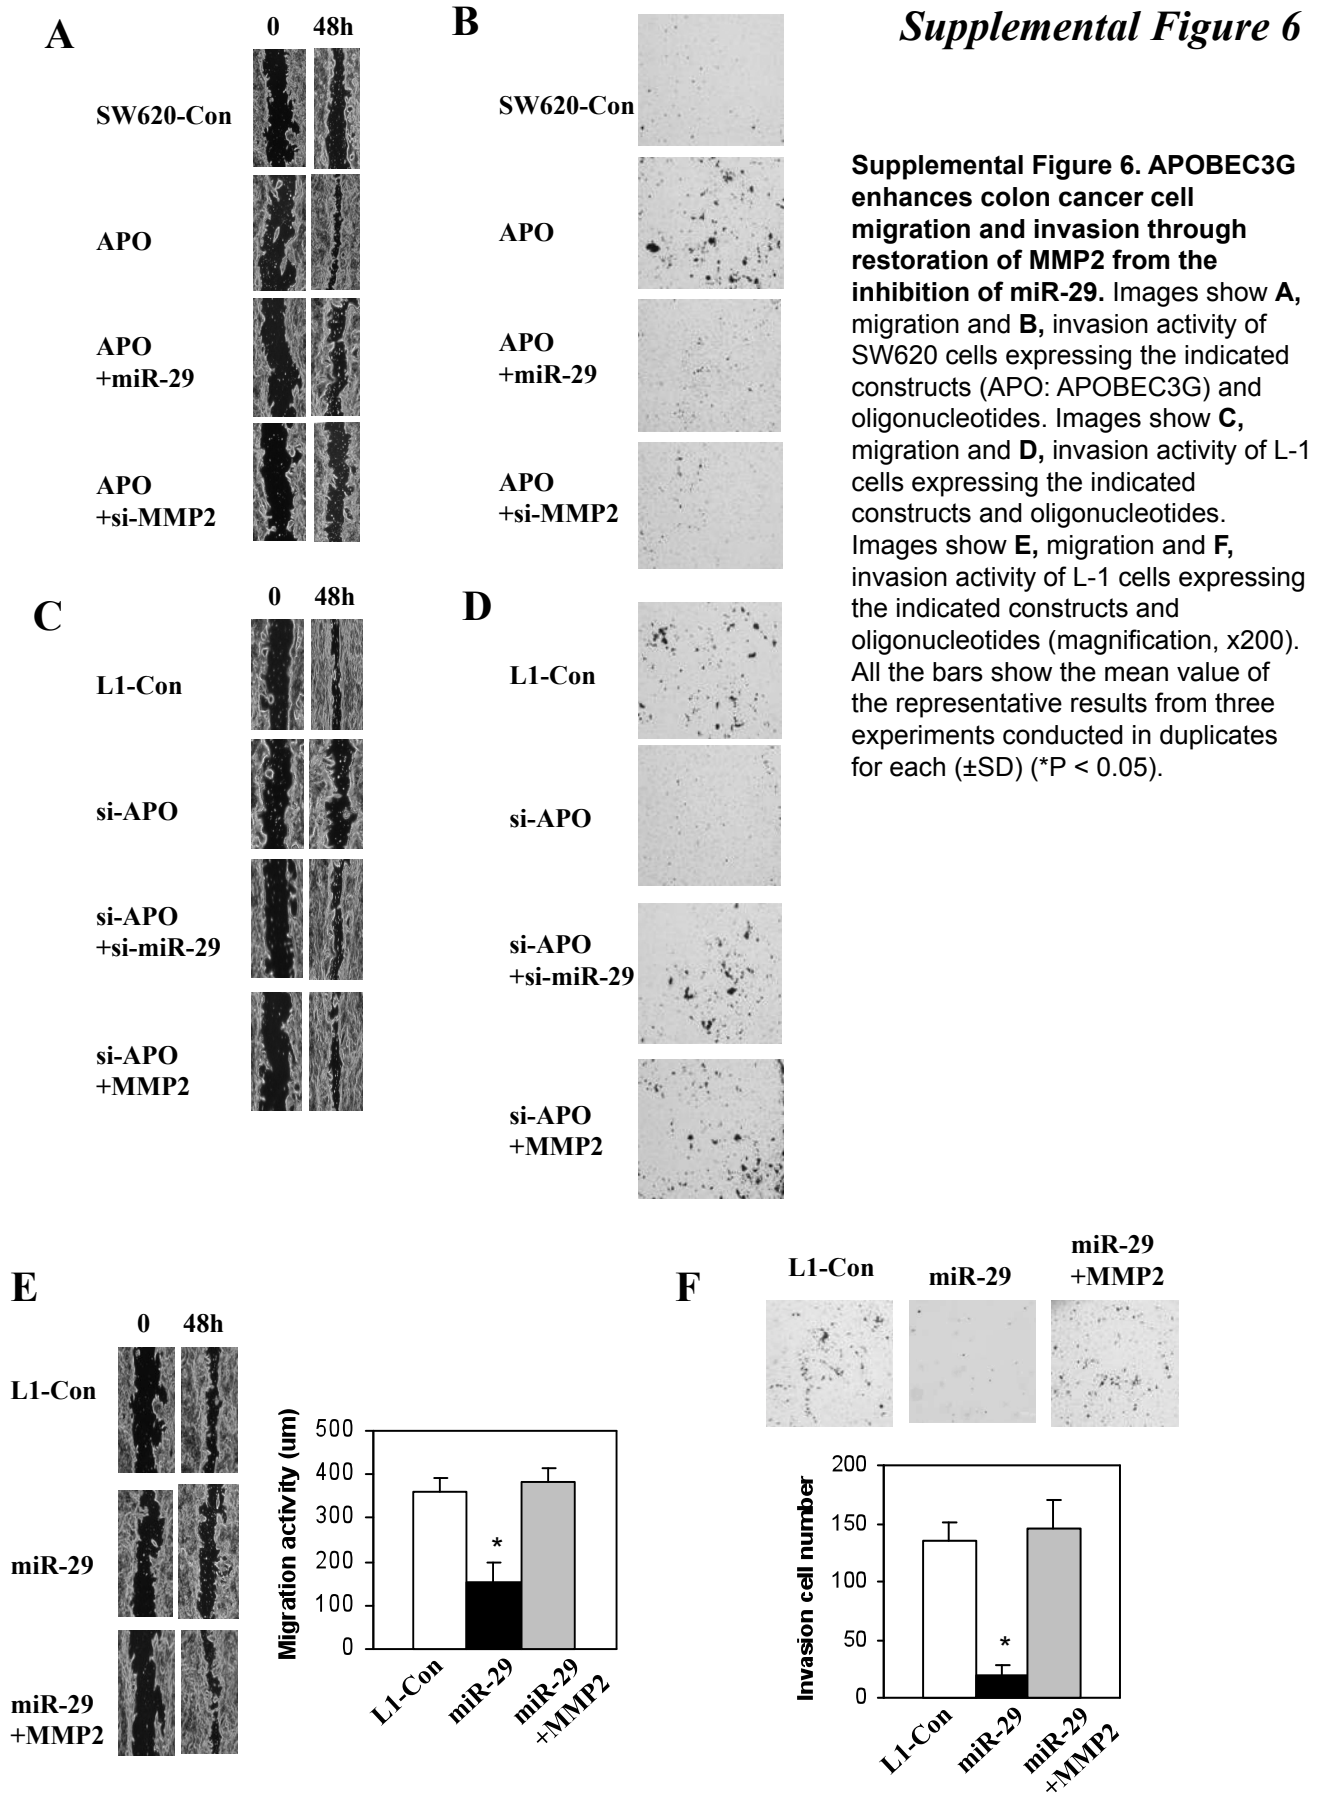



## Supplemental Figure 7

**Supplemental Figure 7. Knocking-down APOBEC3G does not affect cell apoptosis and viability.** L-1 cells knocked-down Apobec3G (APO) alone or knocked-down APOBEC3G and miR-29 together were measure for **A**, sub-G1 population detected by propidium iodide- flow cytometry analysis (n.s. non-significant); **B**, cell viability detected by MTT assay. Bars show the mean value of the representative results from three experiments conducted in duplicates for each ( $\pm$ SD).

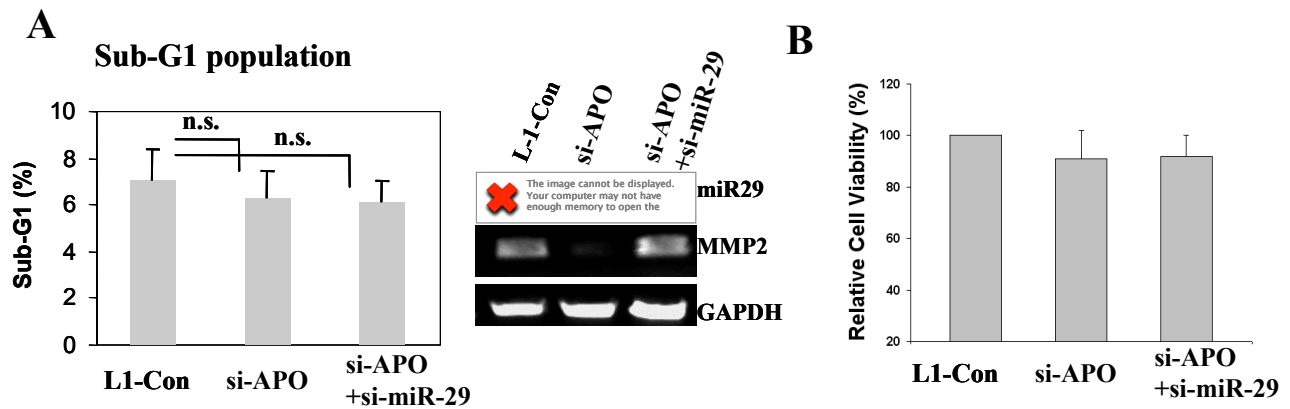

Supplement: JCI45008sd.pdf [file JCI45008sd.pdf]
